# Supplementary material for: Immuno-PET imaging based radioimmunotherapy in head and neck squamous cell carcinoma model
Source: PubMed Central journal article supplement (PMC5696166; doi:10.18632/oncotarget.20760), 2017-09-08
Supplement: oncotarget-08-92090-s001.pdf [file oncotarget-08-92090-s001.pdf]

# Immuno-PET imaging based radioimmunotherapy in head and neck squamous cell carcinoma model

## SUPPLEMENTARY MATERIALS

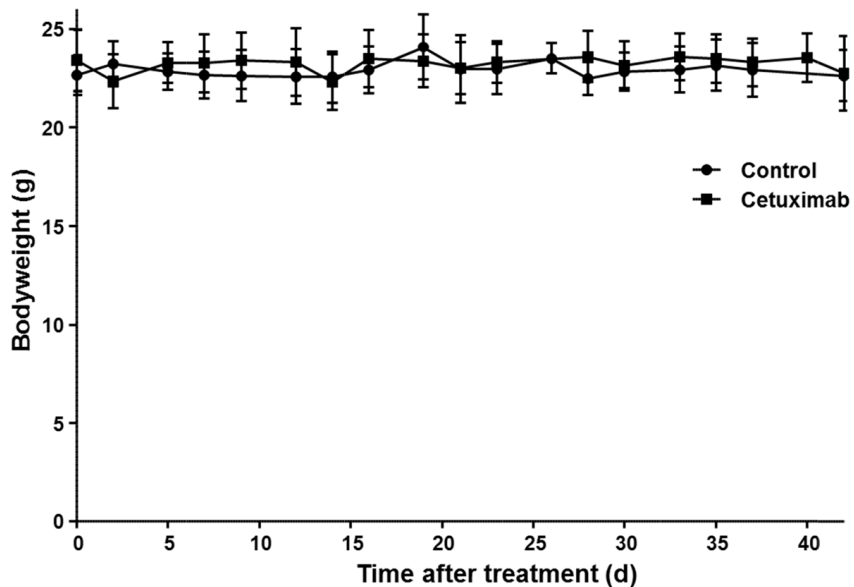

**Supplementary Figure 1: Body weight changes in SNU-1066 xenograft model administered saline or cetuximab.** Body weight was monitored three times a week during therapy. No significant weight loss was observed in saline (control) and cetuximab treatment groups.

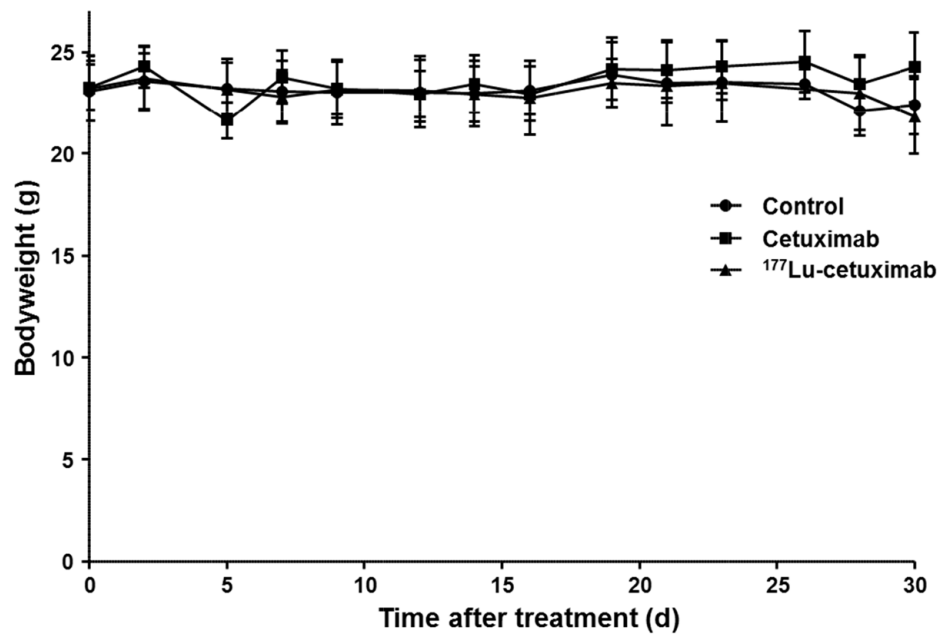

**Supplementary Figure 2: Body weight changes in SNU-1066 xenograft model administered saline, cetuximab or <sup>177</sup>Lu-PCTA-cetuximab.** Body weight was monitored three times a week during therapy. No significant weight loss was observed in saline (control), cetuximab and <sup>177</sup>Lu-PCTA-cetuximab treatment groups.
